# Supplementary material
Source: PubMed Central journal article supplement (PMC4113323)

### A. BISS total scores

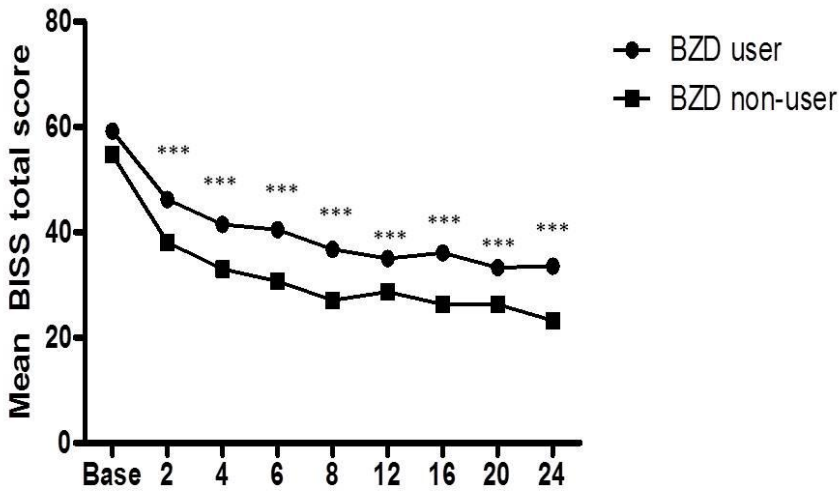

### B. BISS irritability factor scores

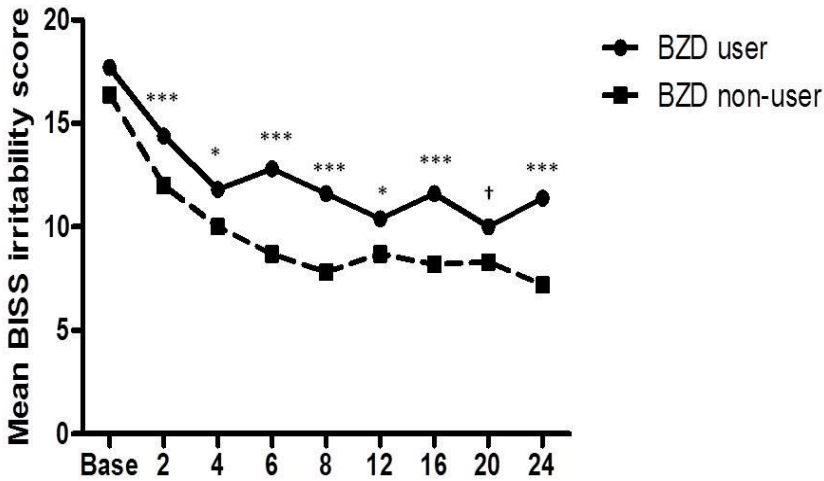

### C. CGI-BP total scores

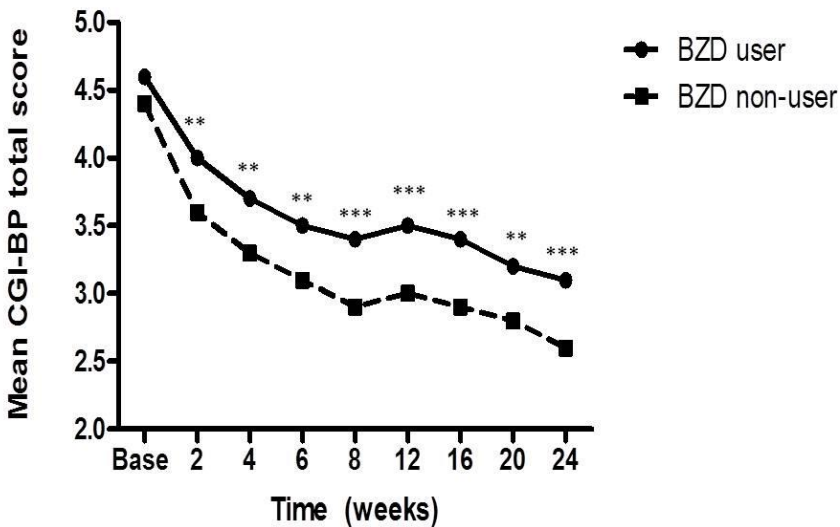

Supplement: NIHMS577825-supplement-02.pdf [file NIHMS577825-supplement-02.pdf]
